# Supplementary material for: Effect of Cytosolic pH on Inward Currents Reveals Structural Characteristics of the Proton Transport Cycle in the Influenza A Protein M2 in Cell-Free Membrane Patches of Xenopus oocytes
Source: PLoS One. 2014 Sep 11;9(9):e107406. doi: 10.1371/journal.pone.0107406 (PMC4174909; doi:10.1371/journal.pone.0107406)
Supplement: File S2 — Table S1. Averaged IV curves from macro-patches from water-injected control oocytes and oocytes injected with M2D44A RNA. (XLSX) [file pone.0107406.s002.xlsx]

## Sheet: Tabelle1
	Table S1. Averaged IV curves from macro-patches from water-injected control oocytes and oocytes injected with M2D44A RNA.
	Vmembrane		water injected						M2D44A
	mV	pHc=5.5	pHc=5.5	pHc=7.5	pHc=7.5	pHc=8.2	pHc=8.2	pHc=5.5	pHc=5.5	pHc=7.5	pHc=7.5	pHc=8.2	pHc=8.2
		I / pA	std	I / pA	std	I / pA	std	I / pA	std	I / pA	std	I / pA	std
	-100	-10.16	1.13	-12.3	2.07	-12.53	1.8	-26.13	0	-64.27	20.2	-202.5	35.3
	-80	-8.98	0.93	-10.1	1.53	-10.21	1.2	-21.3	0	-54.87	17.2	-153.7	20.1
	-60	-7.77	0.78	-8.4	1.12	-8.7	0.97	-13.5	3.07	-45.7	14.7	-113.9	7.5
	-40	-6.59	0.69	-6.6	0.83	-7.36	1.04	-10.09	2.6	-36.98	11.9	-88.15	6.9
	-20	-5.16	0.53	-4.77	0.49	-5.23	0.83	-7.03	1.7	-28.8	9.4	-64.46	5.2
	0	-3.43	0.31	-2.79	0.34	-1.83	0.76	-3.3	1.6	-21.35	7.2	-44	4.3
	20	-1.41	0.47	-0.41	0.67	1.74	1.58	1	1	-14.08	4.9	-27.3	6.03
	40	0.87	0.87	2.26	1.17	7.93	3.1	4.31	0.86	-7.77	3.1	-16.5	7.12
	60	3.47	1.3	5.14	1.67	14.19	4.9	7.36	0.63	-0.41	1.8	-5.36	8.45
	80	6.65	2.13	8.35	2.15	21.17	7.4	14.98	0	6.02	3.5	7.28	10.39
	100	10	2.77	11.36	3.04	26.82	12.8	17.33	0	7.94	2.4	8.37	0.23
